# Supplementary material for: Genotype and Phenotype Analyses in Pediatric Patients with HNF1B Mutations
Source: PubMed Central journal article supplement (PMC7408390; doi:10.3390/jcm9072320), 2020-07-21
Supplement: jcm-09-02320-s001.pdf [file jcm-09-02320-s001.pdf]

# Supplementary Material: Genotype and Phenotype Analyses in Pediatric Patients with *HNF1B* Mutations

Seon Hee Lim, Ji Hyun Kim, Kyoung Hee Han, Yo Han Ahn, Hee Gyung Kang,  
Il-Soo Ha and Hae Il Cheong

Table S1. Primers used for PCR amplification of the *HNF1B* gene.

| Exon | Forward Primers (5'-3') | Reverse Primer (5'-3') | Size (Base Pair) |
|------|-------------------------|------------------------|------------------|
| 1    | AACAGGT GTCTGGAGGCTGA   | GGTGTGGGAGAGAAGCAGAG   | 619              |
| 2    | AGGGATGAGGTGTACCGTACAG  | AACCACCAAGGCCAAATCTAC  | 553              |
| 3    | TCTCCAGCTCCACATGCAGT    | GGTCTGTGACTTGCCACCT    | 463              |
| 4    | GGATTGGCCTTTTCTCTGCA    | AACCAGATAAGATCCGTGGCA  | 473              |
| 5    | GTGCCGAGTCATTGTCCAG     | CTATGGGGCTACAATGGTTCAT | 338              |
| 6    | CATGCCAAGGAATCGCTAAGT   | AATGATTTGACCCAGGATGCA  | 481              |
| 7    | TTACACTTGCCTCCCATGGA    | CCGAGAAAAGTTCAGACCCAGA | 422              |
| 8    | ACATGCTTTCGGGAGTTGGT    | CACAACCTTTGCACATCCATG  | 390              |
| 9    | TGTTGAGTTGGGCATCATC     | GATTGTCTGAGGTGCCAGCA   | 279              |
